# Supplementary material for: Defective graphene/SiGe heterostructures as anodes of Li-ion batteries: a first-principles calculation study
Source: Royal Society of Chemistry journal article supplement (doi:10.1039/d2cp04040a), 2022-11-28
Supplement: d2cp04040a1.pdf [file d2cp04040a1.pdf]

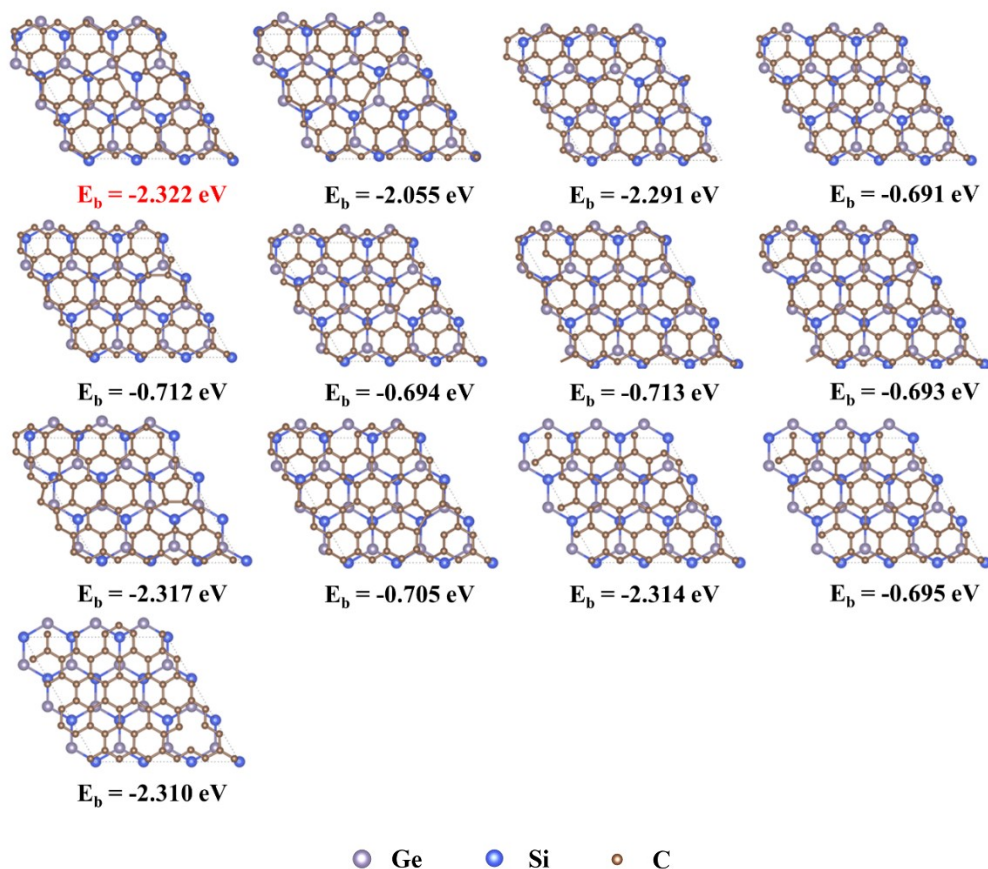

**Figure S1** SV-G/S configurations based on symmetry considerations ( $E_b$  represents the binding energy).

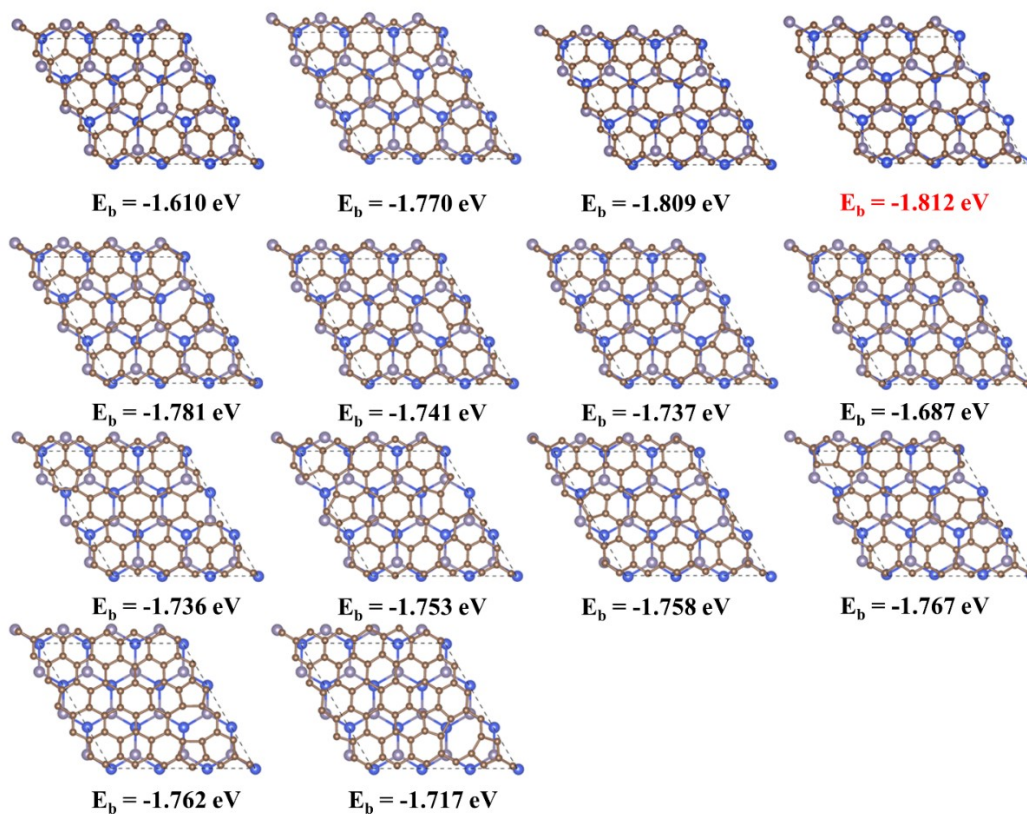

**Figure S2** DV-G/S configurations based on symmetry considerations. ( $E_b$  represents the binding energy).

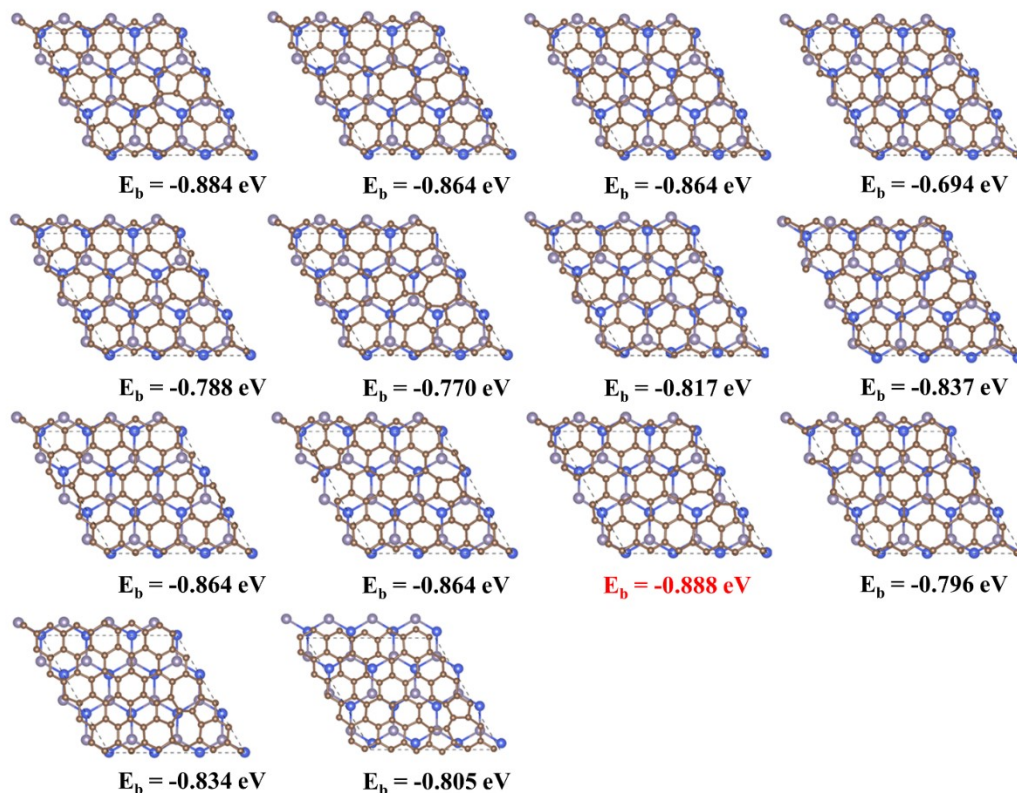

**Figure S3** SW-G/S configurations based on symmetry considerations. ( $E_b$  represents the binding energy).

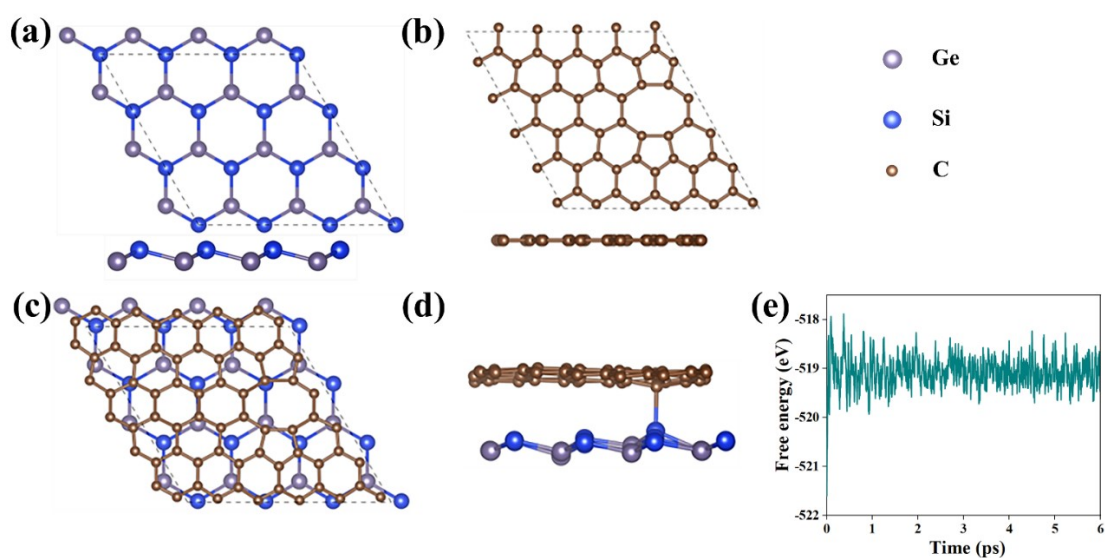

**Figure S4** (a) Top and side views of the structure of 2D SiGe. (b) Top and side views of the structure of graphene with DV defect. (c) Top and (d) side view the

structure of DV-G/S. (e) Free Energy as a function of MD time at a temperature of 300K for DV-G/S.

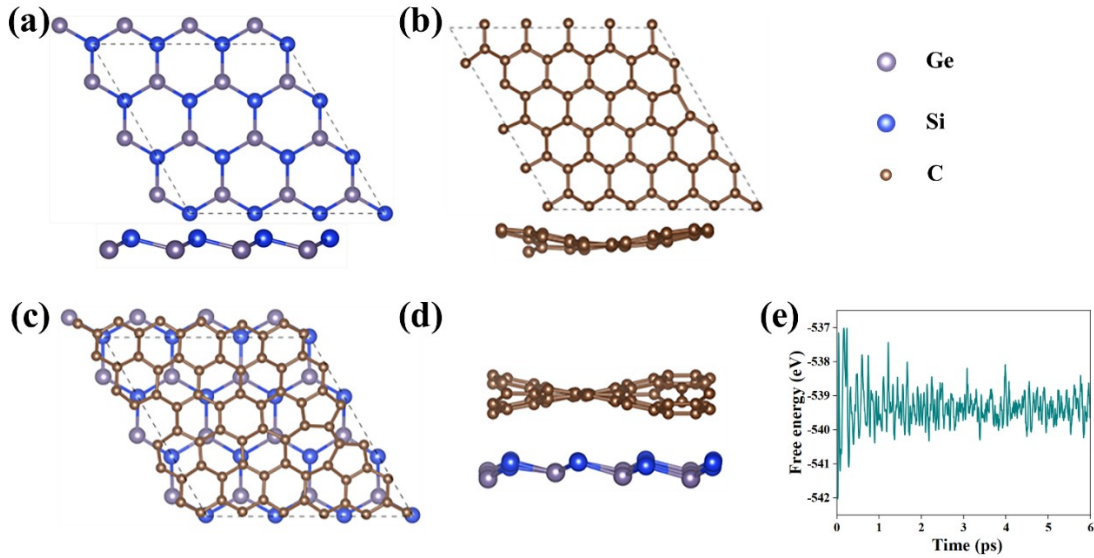

**Figure S5** (a) Top and side views of the structure of 2D SiGe. (b) Top and side views of the structure of graphene with SW defect. (c) Top and (d) side view the structure of SW-G/S. (e) Free Energy as a function of MD time at a temperature of 300K for SW-G/S.

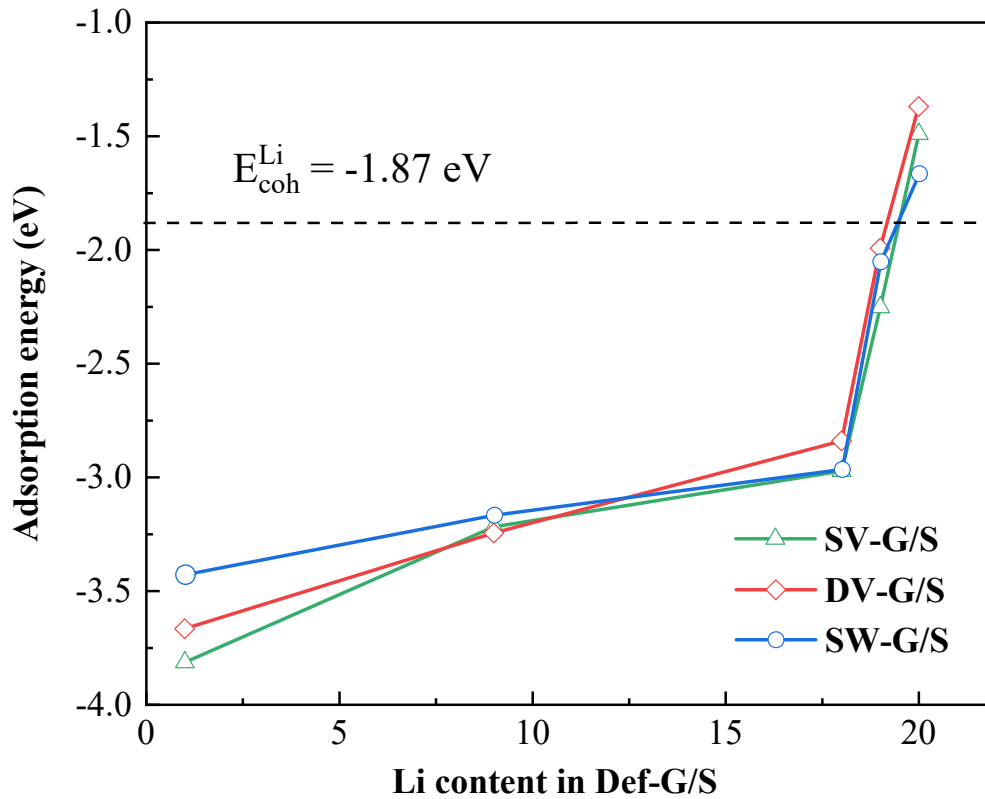

**Figure S6** Li adsorption energies of SV-G/S, DV-G/S and SW-G/S as a function of Li adsorption concentration.
