# Supplementary material for: Defective graphene/SiGe heterostructures as anodes of Li-ion batteries: a first-principles calculation study
Source: Royal Society of Chemistry journal article supplement (doi:10.1039/d2cp04040a), 2022-11-28
Supplement: d2cp04040a2.pdf [file d2cp04040a2.pdf]

## Supporting Information

### **Defective Graphene/SiGe heterostructure as anodes of Li-ion Batteries: A first-principles calculations**

**Jun Song**<sup>a, \*</sup>, **Mingjie Jiang**<sup>a</sup>, **Chi Wan**<sup>b, c</sup>, **Huijie Li**<sup>a</sup>, **Qi Zhang**<sup>a</sup>, **Yuhui Chen**<sup>a</sup>, **Xuehong Wu**<sup>a</sup>,  
**Xuemei Yin**<sup>a, \*</sup>, **Juanfang Liu**<sup>b, c</sup>

<sup>a</sup>*College of Energy and Power Engineering, Zhengzhou University of Light Industry, Zhengzhou 450000, Henan, China*

<sup>b</sup>*School of Energy and Power Engineering, Chongqing University, Chongqing 400044, China*

<sup>c</sup>*Key Laboratory of Low-grade Energy Utilization Technologies and Systems, Ministry of Education of China, Chongqing University, Chongqing 400044, China*

## Contents

1. Three heterostructures and their binding energy.....S1-S3
2. The structural properties of DV-G/S and SW-G/S.....S4
3. Li adsorption energy changes with Li concentration.....S5
4. Adsorption energy of Li on different surfaces of Def-G/S....S6
5. Average charge transfer in DV-G/S and SW-G/S.....S7



**Figure S1** SV-G/S configurations based on symmetry considerations ( $E_b$  represents the binding energy).



**Figure S2** DV-G/S configurations based on symmetry considerations. ( $E_b$  represents the binding energy).



**Figure S3** SW-G/S configurations based on symmetry considerations. ( $E_b$  represents the binding energy).



**Figure S4** (a) Top and side views of the structure of 2D SiGe. (b) Top and side views of the structure of graphene with DV defect. (c) Top and (d) side view the structure of DV-G/S. (e) Free Energy as a function of MD time at a temperature of 300K for DV-G/S.



**Figure S5** (a) Top and side views of the structure of 2D SiGe. (b) Top and side views of the structure of graphene with SW defect. (c) Top and (d) side view the structure of SW-G/S. (e) Free Energy as a function of MD time at a temperature of 300K for SW-G/S.



**Figure S6** Li adsorption energies of SV-G/S, DV-G/S and SW-G/S as a function of Li adsorption concentration.

**Table S1** Adsorption energies (eV) for Li adsorbed at each possible adsorption site on the top, middle and bottom of Def-G/S.

| Adsorption site | SV-G/S |        |        | DV-G/S |        |        | SW-G/S |        |        |
|-----------------|--------|--------|--------|--------|--------|--------|--------|--------|--------|
|                 | top    | middle | bottom | top    | middle | bottom | top    | middle | bottom |
| 1               | -2.41  | -3.58  | -3.18  | -2.44  | -3.56  | -3.11  | -2.15  | -3.33  | -2.95  |
| 2               | -2.39  | -3.65  | -3.18  | -2.40  | -3.45  | -3.09  | -2.16  | -3.40  | -2.92  |
| 3               | -2.46  | -3.25  | -3.16  | -2.40  | -3.57  | -3.14  | -2.20  | -3.33  | -2.91  |
| 4               | -2.54  | -3.71  | -3.19  | -2.42  | -3.57  | -3.10  | -2.20  | -3.35  | -2.91  |
| 5               | -2.57  | -3.81  | -3.21  | -2.45  | -3.54  | -3.15  | -2.19  | -3.43  | -2.93  |
| 6               | -2.41  | -3.24  | -3.16  | -2.57  | -3.67  | -3.14  | -2.23  | -3.43  | -2.92  |
| 7               | -2.40  | -3.71  | -3.19  | -2.42  | -3.51  | -3.12  | -2.20  | -3.29  | -2.90  |
| 8               | -2.66  | -3.65  | -3.18  | -2.44  | -3.66  | -3.15  | -2.17  | -3.42  | -2.93  |
| 9               | -3.05  | -3.51  | -3.14  | -2.56  | -3.61  | -3.13  | -2.15  | -3.07  | -2.87  |
| 10              | -3.05  | -      | -      | -2.63  | -      | -      | -2.22  | -      | -      |
| 11              | -2.42  | -      | -      | -2.53  | -      | -      | -2.49  | -      | -      |
| 12              | -2.50  | -      | -      | -2.45  | -      | -      | -2.22  | -      | -      |
| 13              | -2.80  | -      | -      | -2.57  | -      | -      | -2.17  | -      | -      |
| 14              | -3.05  | -      | -      | -2.92  | -      | -      | -2.30  | -      | -      |
| 15              | -2.56  | -      | -      | -2.41  | -      | -      | -2.40  | -      | -      |
| 16              | -2.40  | -      | -      | -2.42  | -      | -      | -2.38  | -      | -      |
| 17              | -2.50  | -      | -      | -2.61  | -      | -      | -2.19  | -      | -      |
| 18              | -2.66  | -      | -      | -2.72  | -      | -      | -2.20  | -      | -      |
| 19              | -2.54  | -      | -      | -2.61  | -      | -      | -2.46  | -      | -      |
| 20              | -2.44  | -      | -      | -2.36  | -      | -      | -2.48  | -      | -      |
| 21              | -2.42  | -      | -      | -2.48  | -      | -      | -2.29  | -      | -      |
| 22              | -2.41  | -      | -      | -2.48  | -      | -      | -2.17  | -      | -      |
| 23              | -2.46  | -      | -      | -2.48  | -      | -      | -2.23  | -      | -      |
| 24              | -2.45  | -      | -      | -2.39  | -      | -      | -2.30  | -      | -      |
| 25              | -2.44  | -      | -      | -      | -      | -      | -2.47  | -      | -      |
| Mean value      | -2.56  | -3.57  | -3.18  | -2.51  | -3.57  | -3.13  | -2.27  | -3.34  | -2.91  |



**Table S2** Average charge transfer of Li( $\Delta Q_{Li}$ ), top ( $\Delta Q_{Gra}$ ) and bottom ( $\Delta Q_{SiGe}$ ) in DV-G/S, A positive/negative  $\Delta Q$  denote a loss/gain of electrons.

| System      | $\Delta Q_{Li}$ | $\Delta Q_{SiGe}$ | $\Delta Q_{Gra}$ |
|-------------|-----------------|-------------------|------------------|
| Li/Gra/SiGe | +0.79           | -1.34             | +0.55            |
| Gra/Li/SiGe | +0.44           | -0.96             | +0.52            |
| Gra/SiGe/Li | +0.43           | -0.90             | +0.47            |

**Table S3** Average charge transfer of Li( $\Delta Q_{Li}$ ), top ( $\Delta Q_{Gra}$ ) and bottom ( $\Delta Q_{SiGe}$ ) in SW-G/S, A positive/negative  $\Delta Q$  denote a loss/gain of electrons.

| System      | $\Delta Q_{Li}$ | $\Delta Q_{SiGe}$ | $\Delta Q_{Gra}$ |
|-------------|-----------------|-------------------|------------------|
| Li/Gra/SiGe | +0.76           | -1.11             | +0.36            |
| Gra/Li/SiGe | +0.36           | -0.67             | +0.30            |
| Gra/SiGe/Li | +0.40           | -0.62             | +0.22            |
